# Supplementary material for: Cross-omics analysis revealed gut microbiome-related metabolic pathways underlying atherosclerosis development after antibiotics treatment
Source: PubMed Central journal article supplement — Mol Metab. 2020 Mar 13;36:100976. doi: 10.1016/j.molmet.2020.100976 (PMC7183232; doi:10.1016/j.molmet.2020.100976), 2020-03-13
Supplement: mmc1.pdf [file mmc1.pdf]

**A**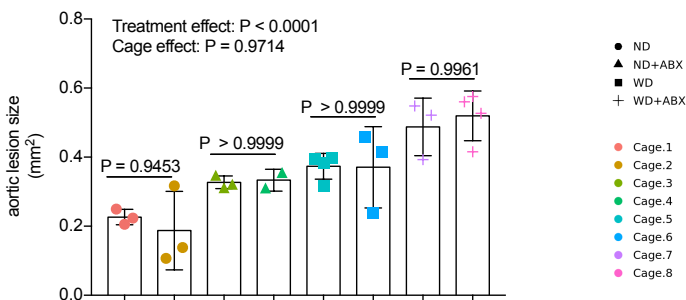**B**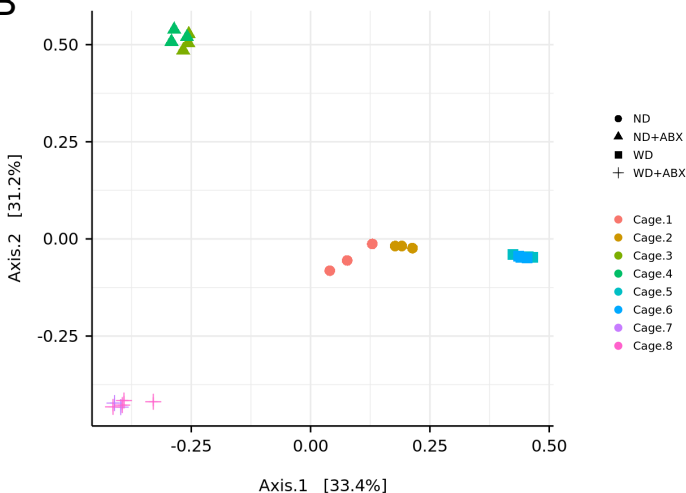**C**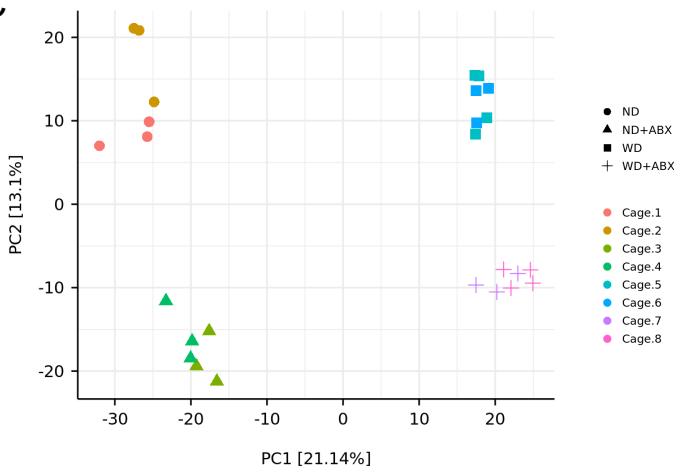**Supplementary Figure S1. Analysis of cage effect in the mouse model.**

(A) Analysis of cage effect on atherosclerotic lesion size. ND: normal diet, WD: Western diet, ABX: antibiotics treatment.  $n = 2 - 4$  per group. Analysis by two-way ANOVA with Tukey's post hoc test. Data are the mean  $\pm$  S.D.

(B) Analysis of cage effect on cecal microbiome composition by principal coordinate analysis.  $n = 3 - 4$  per group.

(C) Analysis of cage effect on serum metabolome by principal component analysis.  $n = 3 - 4$  per group.

**A**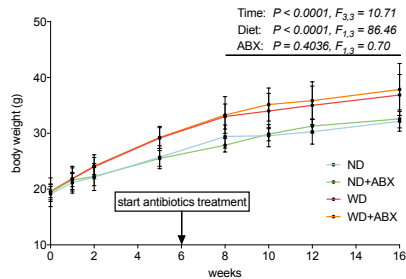**B**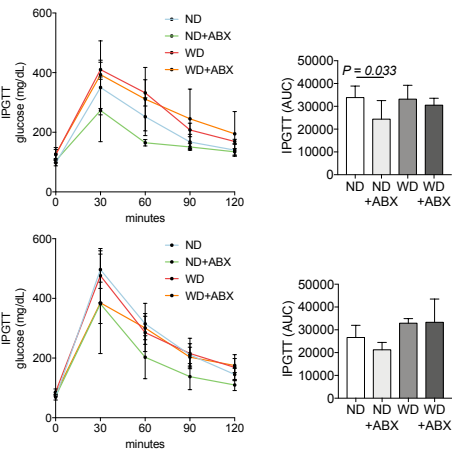**C**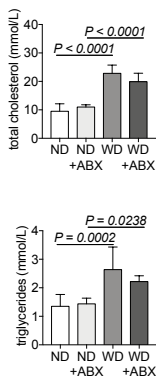**D**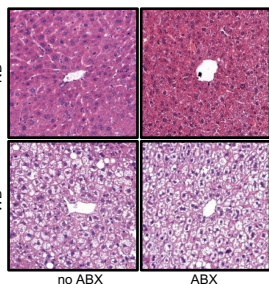**E**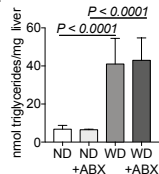**F**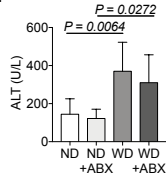**G**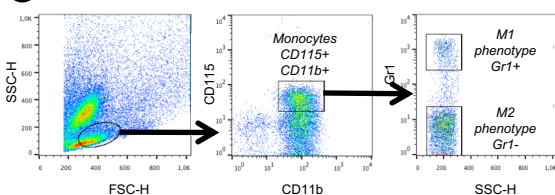**H**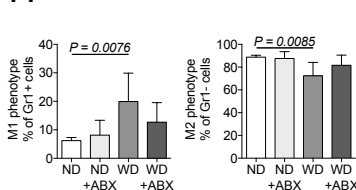

### Supplementary Figure S2. Metabolic phenotyping of ApoE<sup>-/-</sup> mice subjected to antibiotics and different diets.

(A) Body weight of mice over time. ND: normal diet, WD: Western diet, ABX: antibiotics treatment. P- and F-values by 3-way ANOVA. n = 6 – 7 per group.

(B) Intraperitoneal glucose tolerance test (IPGTT) 2 (upper graph) and 8 weeks (lower graph) after initiation of antibiotics treatment. Area under the curve (AUC) analysis of IPGTT analyzed by two-way ANOVA with Tukey's post hoc test. n = 6 – 7 per group.

(C) Analysis of serum cholesterol and triglycerides in the fasted state prior to sacrifice. Two-way ANOVA with Tukey's post hoc test. n = 6 – 7 per group.

(D) Micrographs of liver sections stained with hematoxylin and eosin stain.

(E) Analysis of triglyceride content of the liver. Two-way ANOVA with Tukey's post hoc test. n = 6 – 7 per group.

(F) Analysis of serum alanine aminotransferase (ALT) in the fasted state prior to sacrifice. Two-way ANOVA with Tukey's post hoc test. n = 6 – 7 per group.

(G) Flow cytometry gating strategy to evaluate M1/M2 ratio of circulating monocytes.

(H) Quantification of M1 and M2 circulating monocytes. Two-way ANOVA with Tukey's post hoc test. n = 6 – 7 per group.

All data are the mean  $\pm$  S.D.

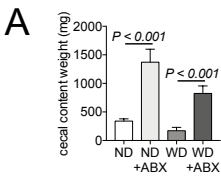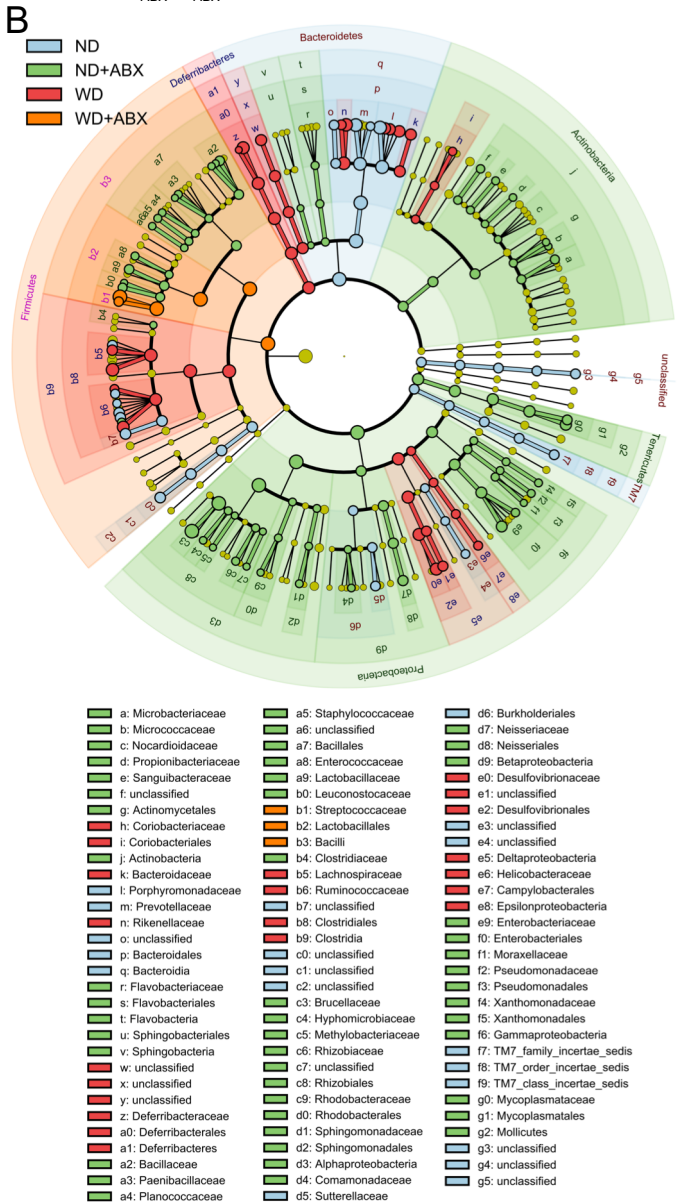

**Supplementary Figure S3. Cecal content weight and group-specific changes in cecal microbiome composition in the mouse model.**

(A) Cecal content weight. Two-way ANOVA with Tukey's post hoc test.  $n = 6 - 7$  per group. ND: normal diet, WD: Western diet, ABX: antibiotics treatment. Data are the mean  $\pm$  S.D.

(B) LEfSe (Linear discriminant analysis effect size) to identify microbial communities at the phylum, class, order, family, and genus levels that interacted consistently with our treatments. Taxa enriched for each group indicated by a positive linear discriminant analysis (LDA) score are highlighted in color.  $n = 6 - 7$  per group.

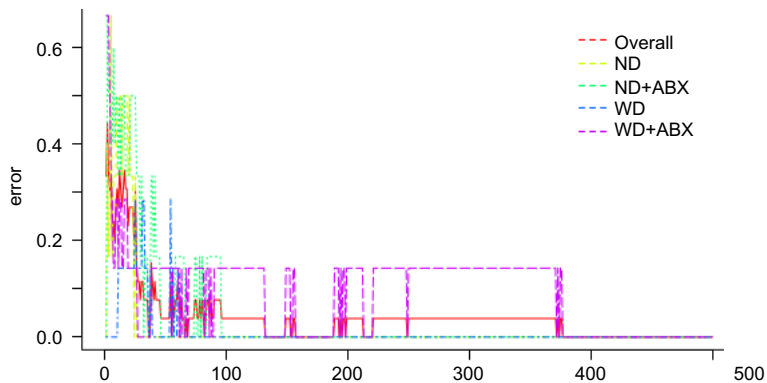

|              |        | predicted group |         |    |         |                    |
|--------------|--------|-----------------|---------|----|---------|--------------------|
|              |        | ND              | ND +ABX | WD | WD +ABX | <i>Class error</i> |
| actual group | ND     | 6               | 0       | 0  | 0       | 0.0                |
|              | ND+ABX | 0               | 6       | 0  | 0       | 0.0                |
|              | WD     | 0               | 0       | 7  | 0       | 0.0                |
|              | WD+ABX | 0               | 0       | 0  | 7       | 0.0                |

*Out of the bag error = 0.0*  
*Predictive accuracy = 100%*

#### Supplementary Figure S4. Random Forest Classification of mouse serum metabolomics.

Random Forest Classification tree and Random Forest confusion matrix of murine serum metabolomics shows 100% predictive accuracy in group assignment. ND: normal diet, WD: Western diet, ABX: antibiotics treatment. n = 6 – 7 per group.

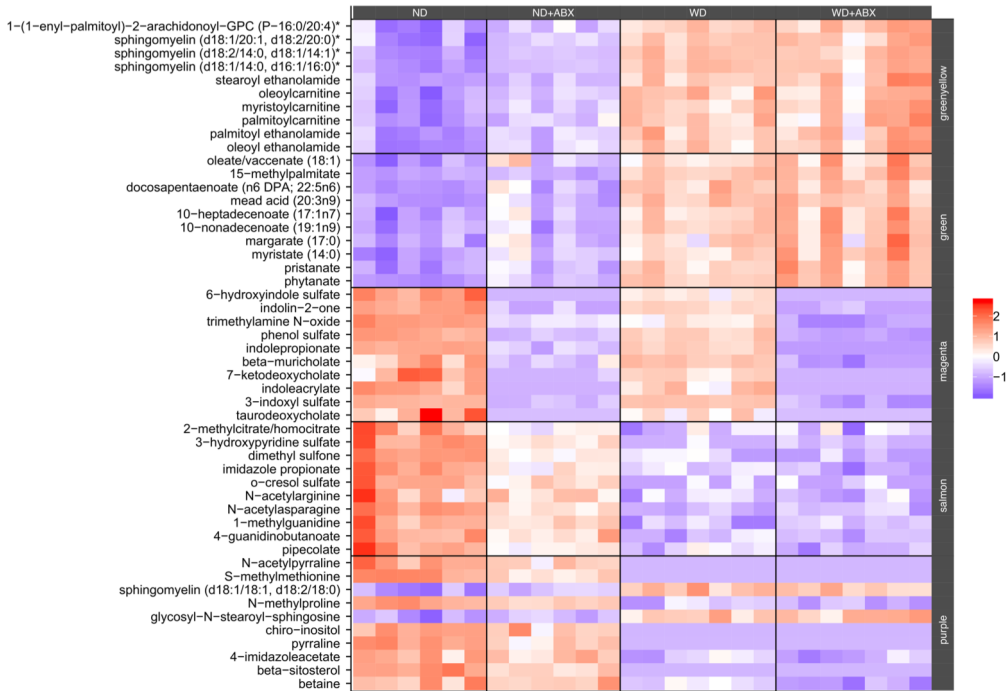

**Supplementary Figure S5. Top 10 ranked serum metabolites of metabolite WGCNA clusters in the mouse model.**

Heatmap of top 10 ranked metabolites in each of the 5 metabolite clusters by weighted correlation network analysis of serum metabolomics that were subjected to phenotype-associated filtering. n = 6 – 7 per group.

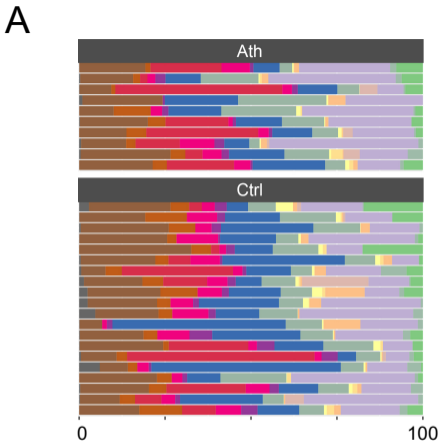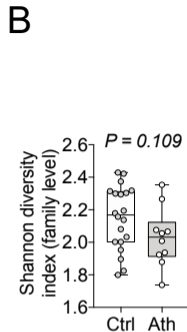

**Supplementary Figure S6. Analysis of fecal microbiota in the human cohort.**

(A) Human fecal relative abundance on family level by 16S rRNA-targeted sequencing. Ath: patients with carotid atherosclerosis. Ctrl: control subjects. Ctrl group  $n = 20$ , Ath group  $n = 10$ .

(B) Human fecal bacterial *alpha* diversity by Shannon index. Boxplots: Center line: median; box limits: 25-75th percentiles; whiskers: min. to max. Data were analyzed via two-sided t-tests with Welch's correction.

A

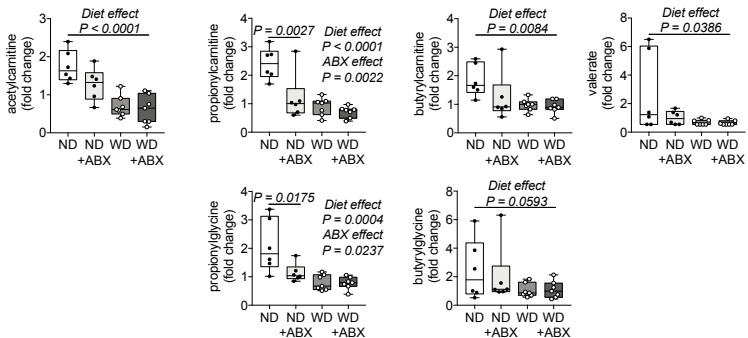

B

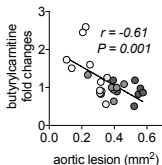

C

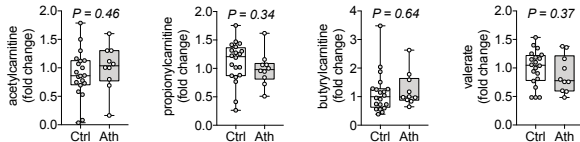

### Supplementary Figure S7. Analysis of short-chain fatty acid metabolism

(A) Short-chain fatty acid metabolites of mouse serum metabolomics. Data were analyzed by 2-way ANOVA with Tukey's posthoc test. Data are the mean  $\pm$  S.D.,  $n = 6 - 7$  per group.. ND: normal diet, WD: Western diet, ABX: antibiotics treatment.

(B) Pearson correlation of mouse serum butyryl/carnitine levels to aortic lesion size,  $n = 5 - 7$  per group.

(C) Short-chain fatty acid metabolites of human serum metabolomics. Data were analyzed by two-sided t-test with Welch's correction (Boxplots: Center line: median; box limits: 25-75th percentiles; whiskers: min. to max.). Ath: patients with carotid atherosclerosis. Ctrl: control subjects. Ctrl group  $n = 20$ , Ath group  $n = 10$ .
